# Supplementary material for: Phloretin attenuation of hepatic steatosis via an improvement of mitochondrial dysfunction by activating AMPK-dependent signaling pathways in C57BL/6J mice and HepG2 cells
Source: Royal Society of Chemistry journal article supplement (doi:10.1039/d1fo02577e), 2021-01-01
Supplement: d1fo02577e1.pdf [file d1fo02577e1.pdf]

Table S1 Specific primers used for qRT-PCR

| Name               | Forward primer       | Reverse primer         | Product length (bp) | Melting Temperature | Gene Bank Code |
|--------------------|----------------------|------------------------|---------------------|---------------------|----------------|
| <i>COX-2</i>       | GCCGACTAAATCAAGCAACA | CAATGGGCATAAAGCTATGG   | 99                  | 53.01               | NC_005089.1    |
| <i>globin</i>      | GAAGCGATTCTAGGGAGCAG | GGAGCAGCGATTCTGAGTAGA  | 90                  | 55.46               | NC_000073.7    |
| <i>ND1</i>         | ATGGCCAACCTCCTACTCCT | GCGGTGATGTAGAGGGTGAT   | 215                 | 58.15               | NC_012920.1    |
| <i>nuclear 18S</i> | ACGGACCAGAGCGAAAGCA  | GACATCTAAGGGCATCACAGAC | 530                 | 59.89               | NC_021160023.1 |
